# Supplementary material for: Ti3C2Tx-Modified PEDOT:PSS Hole-Transport Layer for Inverted Perovskite Solar Cells
Source: MDPI journal article supplement (doi:10.3390/molecules27217452), 2022-11-02
Supplement: s1 [file s1]

## Supporting information

# Ti<sub>3</sub>C<sub>2</sub>T<sub>x</sub> Modified PEDOT:PSS Hole Transport Layer for Inverted Perovskite Solar Cells

Israt Ali <sup>1,2</sup>, Muhammad Faraz Ud Din <sup>3</sup>, Daniele T. Cuzzupè <sup>4</sup>, Azhar Fakhruddin <sup>4</sup>, Louis Hitler <sup>5</sup>, Ghulam Nabi <sup>6</sup>, and Zhi-Gang Gu <sup>1,2</sup>

<sup>1</sup> Fujian Institute of Research on the Structure of Matter, Chinese Academy of Sciences, 350002 Fuzhou, China

<sup>2</sup> University of Chinese Academy of Sciences, Beijing 100049, China

<sup>3</sup> Institute of Physics, Slovak Academy of Sciences, 845 11, Bratislava, Slovak Republic

<sup>4</sup> Department of Physics, University of Konstanz, 78464 Konstanz, Germany

<sup>5</sup> Computational and Bio-Simulation Research Group, University of Calabar, Calabar, Nigeria

<sup>6</sup> Energy Materials Lab (Physics), University of Gujrat, Gujrat 50700 Punjab, Pakistan.

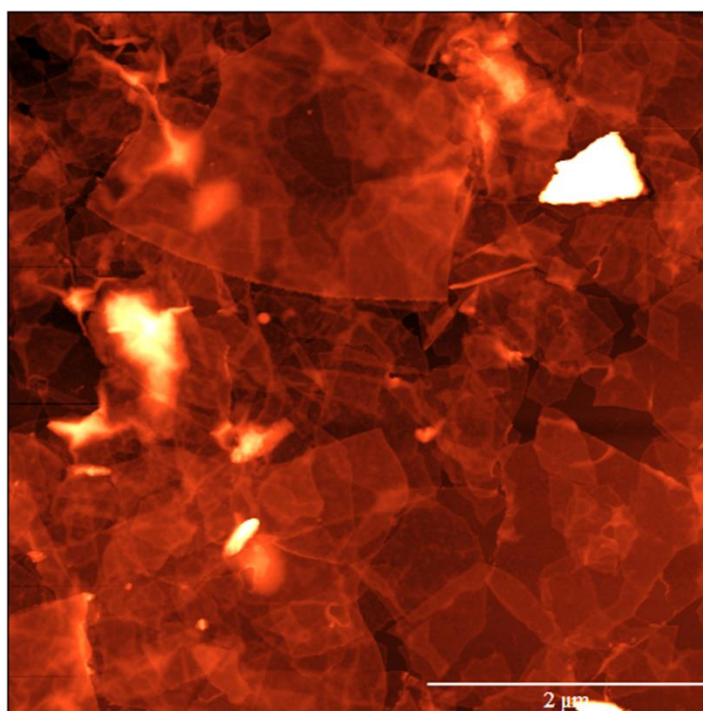

**Figure S1.** AFM image of 24 hours sonicated Ti<sub>3</sub>C<sub>2</sub> nanosheets.

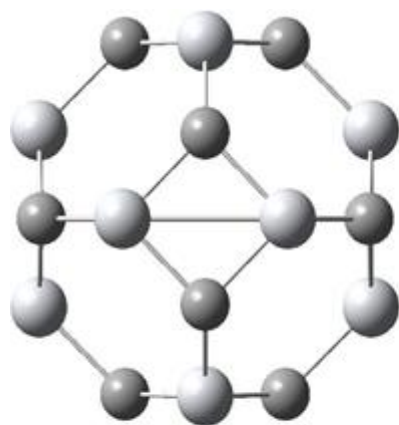

MXene

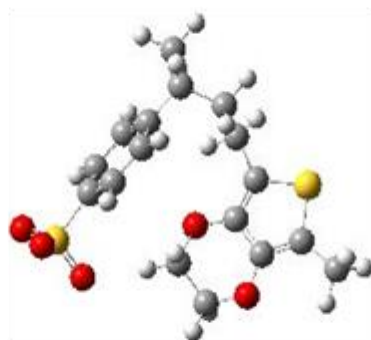

PEDOT:PSS

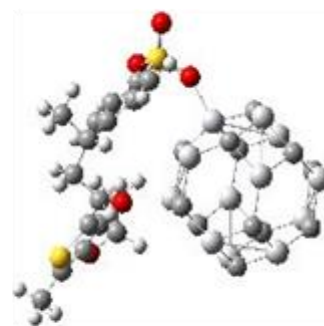

Cluster-polymer

**Figure S2.** Representation of the optimized structure of the cluster, polymer, and the cluster-polymer interaction. White, grey, red, and yellow represent titanium, carbon, oxygen, and sulfur atoms respectively.

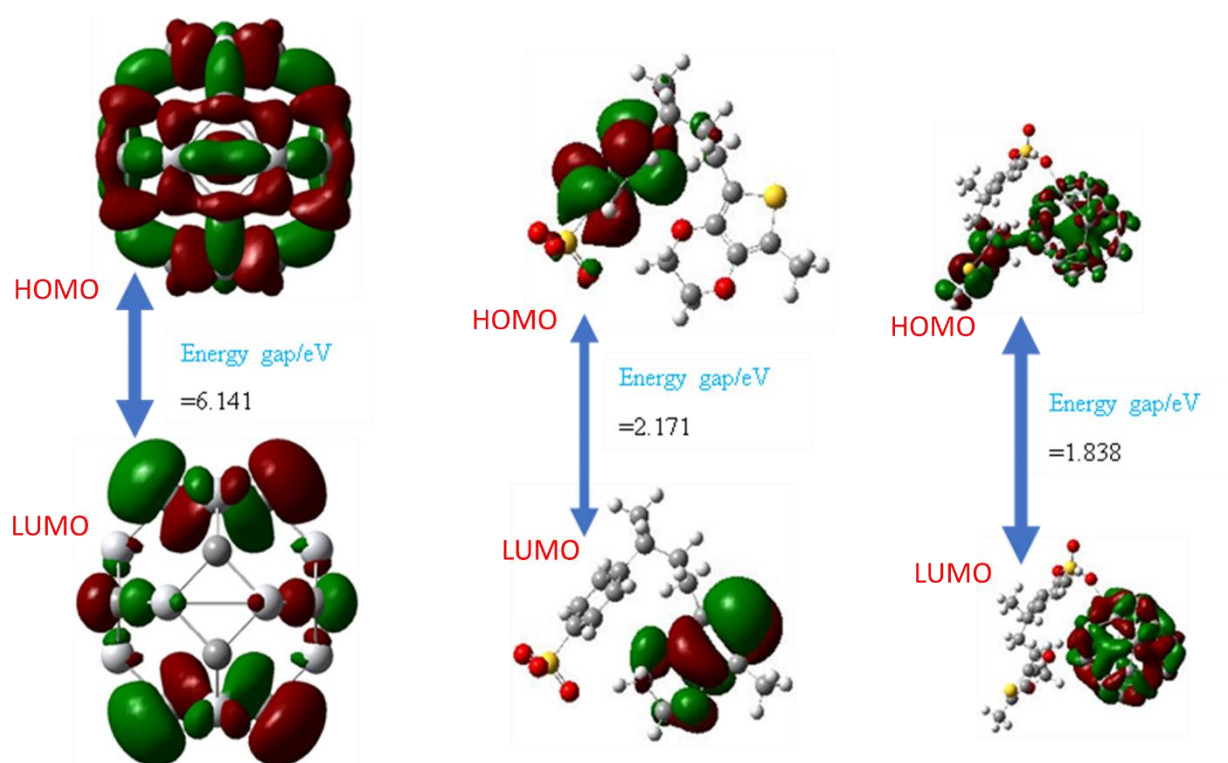

**Figure S3.** Pictorial representation of HOMO-LUMO energies and densities.

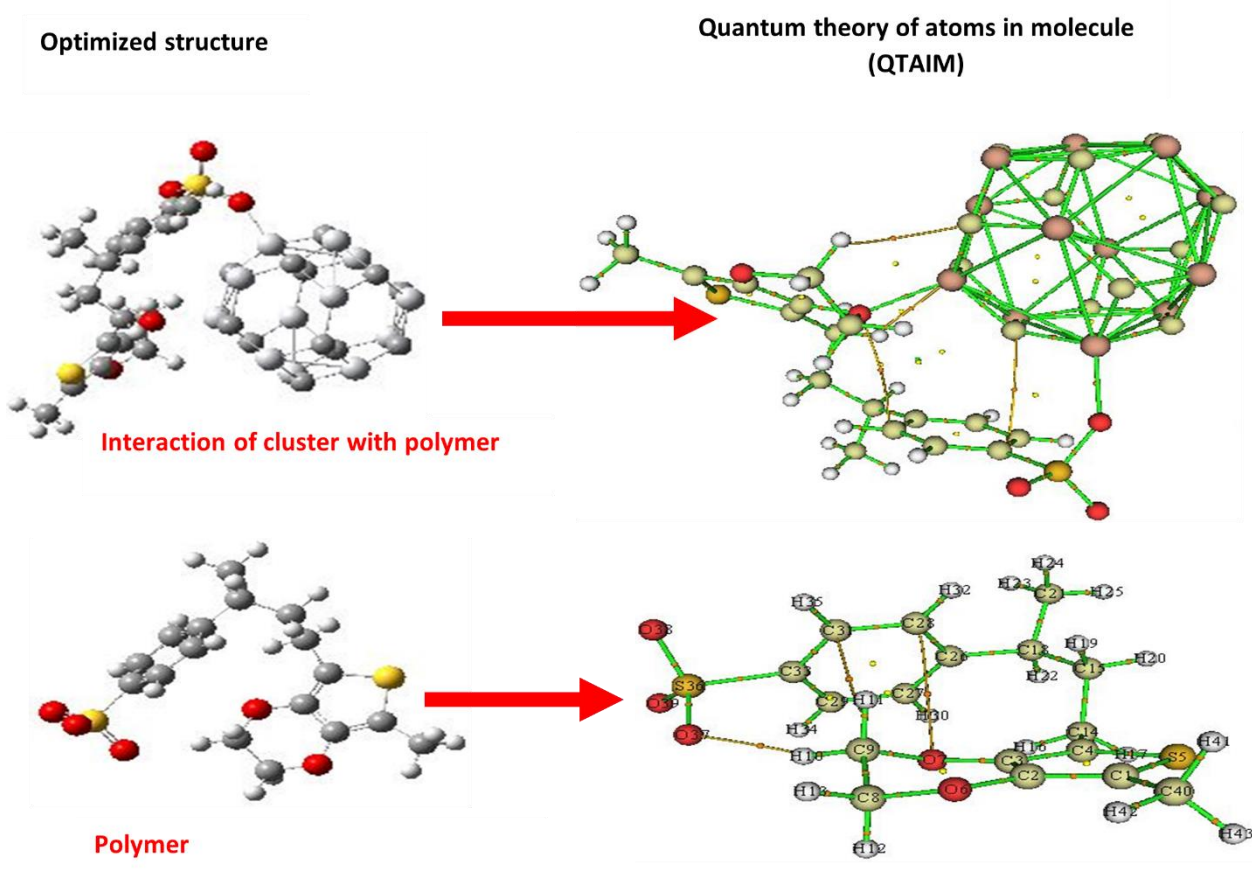

**Figure S4.** Pictorial representation of the Optimized structure and the QTAIM.

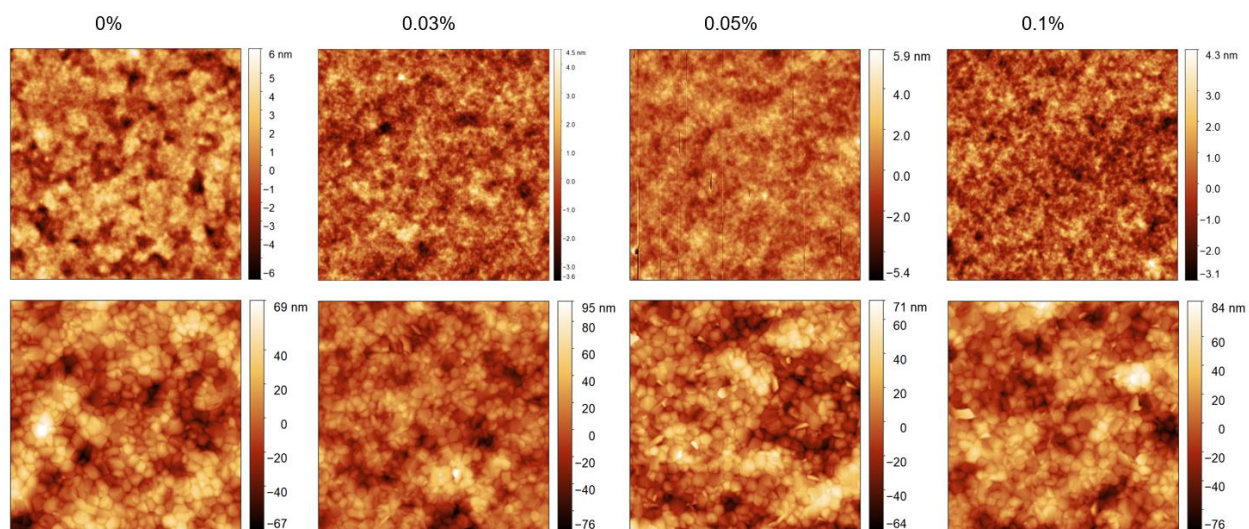

**Figure S5.** (top panel) AFM images of PEDOT:PSS films doped with various concentration of MXenes. (bottom panel) AFM images of perovskite films deposited on top of the same HTLs, respectively.

**Table S1.** Surface roughness of various HTL and perovskite films on HTLs.

| Sample                            | Rms surface roughness (nm) |
|-----------------------------------|----------------------------|
| 0 wt.% PEDOT:PSS                  | 1.66                       |
| 0.03 wt.% MXene – doped PEDOT:PSS | 0.89                       |
| 0.05 wt.% MXene – doped PEDOT:PSS | 0.84                       |
| 0.1 wt.% MXene – doped PEDOT:PSS  | 1.06                       |
| Perovskite on 0 wt.% PEDOT:PSS    | 19.22                      |
| Perovskite on 0.03 wt.% PEDOT:PSS | 18.39                      |
| Perovskite on 0.05 wt.% PEDOT:PSS | 19.84                      |
| Perovskite on 0.1 wt.% PEDOT:PSS  | 21.66                      |

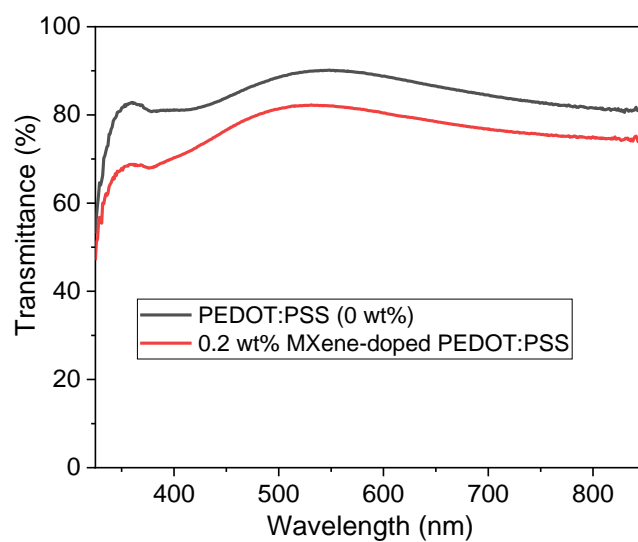

**Figure S6.** Transmittance spectrum of 0.2 wt.% doped MXene in PEDOT:PSS and a pristine PEDOT:PSS layer on ITO.



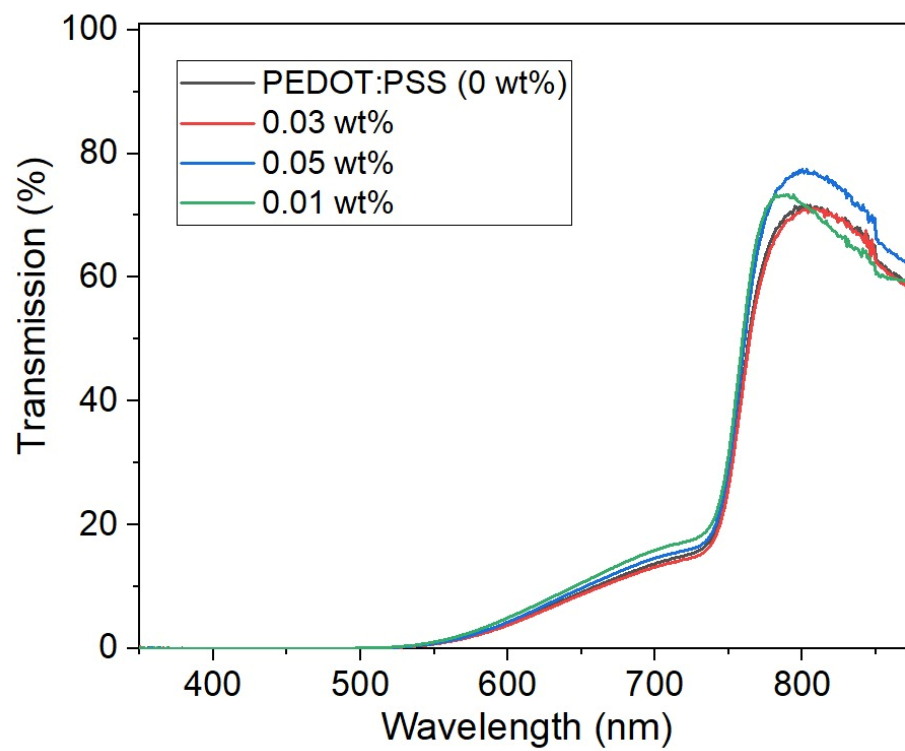

**Figure S7.** Transmission spectra of perovskite films on top of MXene-doped HTLs on ITO.

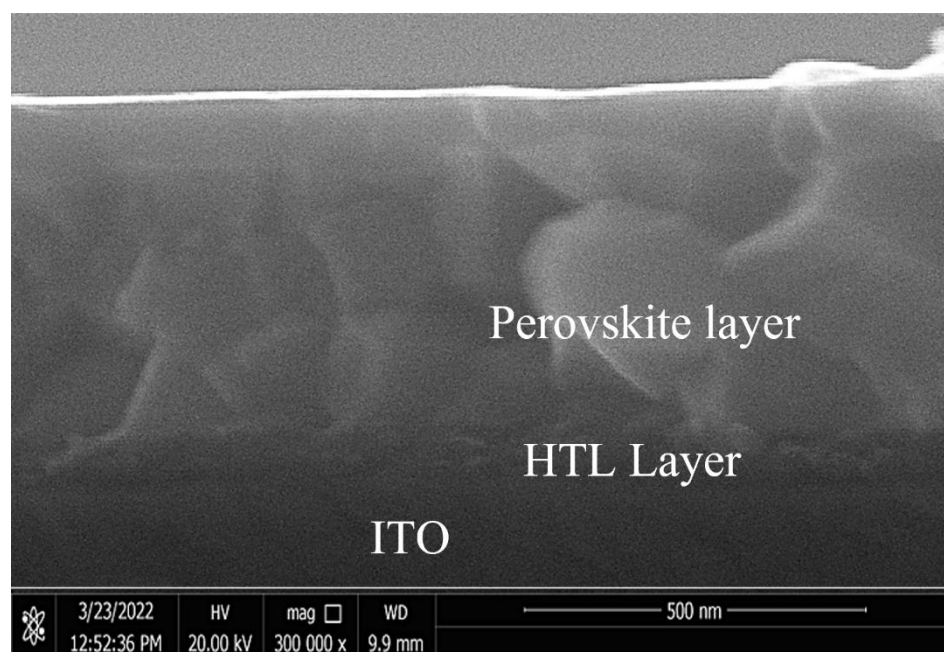

**Figure S8.** Cross-sectional SEM image of the device.

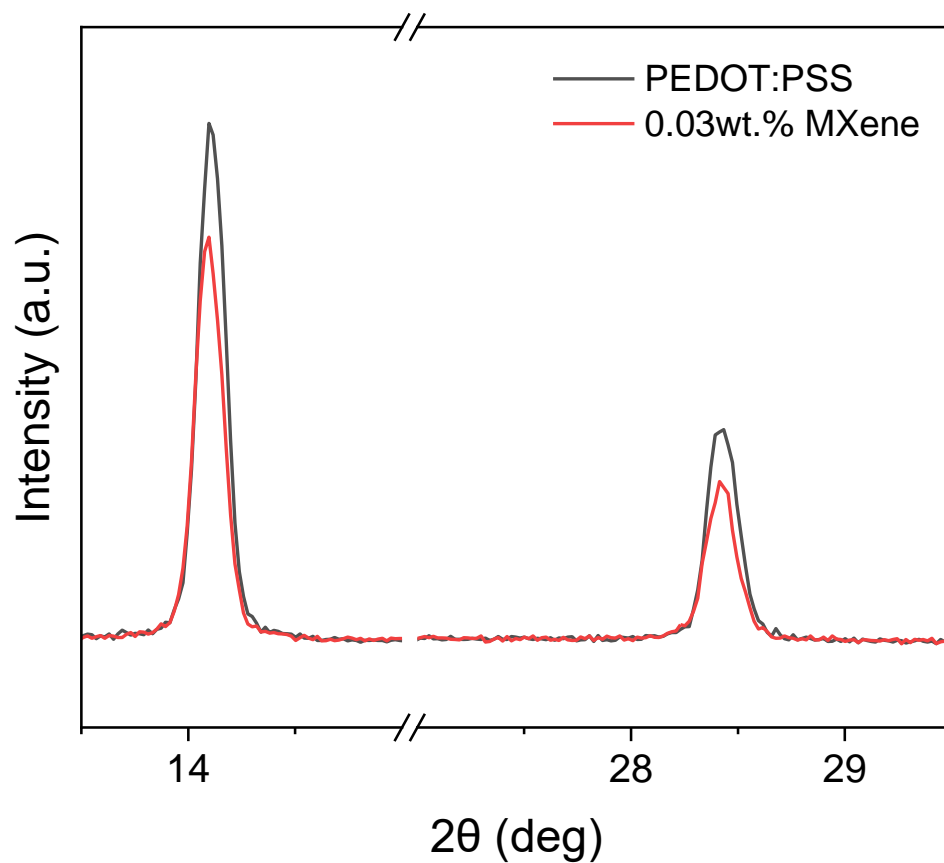

Figure S9: Comparison of the (110) and (220) XRD diffraction peaks.

Table S2. XRD peak analysis.

| Sample                | Peak label | Position (deg) | Intensity | Int. Ratio | Area | FWHM  |
|-----------------------|------------|----------------|-----------|------------|------|-------|
| PEDOT:PSS<br>pristine | (110)      | 14.1           | 19.0      | 2.33       | 2.94 | 0.152 |
|                       | (220)      | 28.4           | 8.1       |            | 1.38 | 0.167 |
| 0.03 wt.%<br>MXene    | (110)      | 14.1           | 15.0      | 2.39       | 2.32 | 0.155 |
|                       | (220)      | 28.4           | 6.3       |            | 0.95 | 0.166 |
